1 Chromatin Patterns Distinguish Breast Tumor Subtypes and Disease Progression in Association  
2 with *ANP32E* levels.

3  
4 Garrett L. Ruff<sup>1</sup>, Kristin E. Murphy<sup>1</sup>, Paula M. Vertino<sup>1,2\*</sup>, Patrick J. Murphy<sup>1,2\*</sup>

5  
6 <sup>1</sup>Department of Biomedical Genetics and <sup>2</sup>Wilmot Cancer Institute, University of Rochester  
7 Medical Center, Rochester NY, 14642

8  
9 \* correspondence:

10  
11 [Patrick\\_Murphy@URMC.Rochester.edu](mailto:Patrick_Murphy@URMC.Rochester.edu) & [Paula\\_Vertino@URMC.Rochester.edu](mailto:Paula_Vertino@URMC.Rochester.edu)

12  
13 601 Elmwood Avenue, Rochester, NY 14624  
14

15 **ABSTRACT:**

16 Despite highly advanced diagnosis and treatment strategies, breast cancer patient outcomes  
17 vary extensively, even among individuals with the same diagnosis. Thus, a better understanding  
18 of the unique molecular characteristics that underlie tumor trajectories and responses to therapy  
19 remains a central goal. We report that chromatin patterns represent an important characteristic,  
20 capable of stratifying tumor identity and progression. We find that patterns of chromatin  
21 accessibility can be classified into 3 major groups, representing Basal-like tumors, hormone  
22 receptor (HR)-expressing tumors, and invasive lobular Luminal-A tumors. Major chromatin  
23 differences occur throughout the genome at motifs for the transcription factor FOXA1 in HR-  
24 positive tumors, and motifs for SOX9 in Basal-like tumors. A large portion of lobular Luminal-A  
25 tumors display a chromatin signature defined by accessibility at FOXA1 binding motifs,  
26 distinguishing them from others within this subtype. Expression of the histone chaperone  
27 *ANP32E* is inversely correlated with tumor progression and chromatin accessibility at FOXA1  
28 binding sites. Tumors with high levels of *ANP32E* exhibit an immune response and proliferative  
29 gene expression signature, whereas tumors with low *ANP32E* levels appear programmed for  
30 differentiation. Our results indicate that *ANP32E* may function through chromatin state  
31 regulation to control breast cancer differentiation and tumor plasticity.

32

33 **INTRODUCTION:**

34 Cellular programming is controlled by epigenetic modifications, transcription factor binding  
35 patterns, and DNA packaging within the nucleus. These mechanisms control how gene  
36 transcription machinery gains access to DNA at transcription start sites (TSS) and cis-regulatory  
37 enhancers, ultimately controlling cellular programming through regulation of gene expression.  
38 Regions with more accessible chromatin tend to be more highly transcribed, and inaccessible  
39 regions are typically silent (1). Overall, chromatin accessibility is generally stable in terminally  
40 differentiated cells, along with steady gene expression profiles, and the majority of chromatin  
41 state dynamics occur either during embryonic development or as a consequence of disease  
42 progression, including during carcinogenesis (1–3). Breast cancer is among the most frequent  
43 and well-studied forms of cancer worldwide, but chromatin state specific differences among  
44 breast cancers have not been established.

45 Breast cancer represents the most diagnosed cancer in women (4) with an estimated 2.1 million  
46 newly diagnosed cases globally in 2018 (5). Measurements of gene expression or protein  
47 abundance have enabled breast tumors to be classified into discrete subtypes, allowing for  
48 diagnosis-specific treatment strategies based on underlying cellular programming.  
49 Measurements of chromatin states have the potential to provide additional insights into breast  
50 cancer mechanism and may ultimately lead to novel therapy strategies. For example, a recent  
51 study of 410 tumors from The Cancer Genome Atlas (TCGA) used chromatin accessibility  
52 measurements to identify more than 500,000 putative gene regulatory elements, including  
53 thousands of genomic locations where accessibility differences occurred in a disease-specific  
54 and tissue-specific manner (2). Separate studies of myeloma have also found that accessibility  
55 levels at gene-distal enhancer regions enable accurate prediction of nearby oncogene  
56 expression levels, as well as cancer subtype classification (6). Similar breast cancer focused  
57 studies are lacking and have the potential to identify parallel associations.

58 Presently, breast cancer diagnostic methods include histologic classification, which is based on  
59 the expression of estrogen receptor (ER) and progesterone receptor (PR), as well as expression  
60 or amplification of the *ERBB2/HER2* (gene/protein). These measurements are critical in  
61 selecting patients for hormonal or HER2-directed therapy. Triple-negative breast cancers  
62 (TNBC) lack expression of these biomarkers (7), and treatment options are thus limited to  
63 chemotherapy. PAM50 (Prediction Analysis of Microarray 50) gene expression profiling is an  
64 effective method to identify “intrinsic subtypes”, classified as Luminal A (Lum-A), Luminal B  
65 (Lum-B), HER2-enriched, and Basal-like (Basal-L), and these subtypes provide initial insight  
66 into molecular mechanisms, likelihood of progression, and patient outcome (8). While much is  
67 known about the biological underpinnings of these subtypes, understanding how they  
68 correspond with chromatin accessibility differences may uncover additional mechanisms,  
69 including novel roles for chromatin and epigenetic factors.

70 The vast majority of transcription factors can only bind DNA at accessible chromatin locations,  
71 rendering them non-functional at inaccessible binding sites (1). When chromatin state changes  
72 occur, increased transcription factor binding generally leads to increased expression of  
73 neighboring genes (1–3). Many transcription factors which are normally active during  
74 development become reactivated in breast cancer, and depending on chromatin state, these  
75 factors may influence tumorigenic behavior. For example, SOX9 and FOXC1 are important for  
76 developmental regulation of transcription in multipotent neural crest stem cells (9, 10), and they  
77 become reactivated in breast cancer to co-regulate Basal-L cancer initiation and proliferation  
78 (11). In contrast, FOXA1, which is normally active in hematopoietic progenitor cells, acts  
79 coordinately with ER to suppress Basal-L programming and reinforce the luminal phenotype  
80 (12, 13). Furthermore, hyperactivity of FOXA1 promotes pro-metastatic transcriptional programs  
81 in endocrine-resistant tumors (14, 15). Thus, assessing chromatin accessibility in breast cancer  
82 tumors, at specific transcription factor binding sites, could be highly informative for studying the  
83 molecular function of numerous factors already known to control cancer outcomes.

84 We recently defined the histone chaperone protein ANP32E as a genome-wide regulator of  
85 chromatin accessibility in mouse fibroblasts (16). ANP32E functions to modulate the  
86 installation/removal of H2A.Z from chromatin, regulating chromatin remodeler activity and  
87 limiting chromatin accessibility. We found that loss of ANP32E caused thousands of gene  
88 promoters and enhancers to become more “open”, leading to activation of neighboring genes.  
89 These changes were accompanied by cellular reprogramming events where loss of ANP32E

90 caused cells to take on a more differentiated transcriptome phenotype. Interestingly, a recent  
91 study suggests that ANP32E may be an independent prognostic marker for human breast  
92 cancers, where higher ANP32E protein levels are associated with the TNBC subtype and  
93 correlated with a shorter overall and disease-free survival. Moreover, forced downregulation of  
94 ANP32E suppressed TNBC tumor growth in xenograft models (17). However, the precise  
95 mechanisms by which ANP32E functions to support breast cancer growth and its role in defining  
96 breast cancer phenotypes has not been fully established.

97 To gain insight into chromatin state function and heterogeneity in human breast cancer, we  
98 used an unsupervised computational approach to segregate tumors into defined groups based  
99 solely on genome-wide chromatin accessibility patterns. Basal-L tumors segregated as a  
100 homogeneous class within group 1, where as a mixture of tumor types was found within group  
101 2, including nearly all Lum-B and HER2-enriched tumors, and group 3 consisted primarily of  
102 lobular Lum-A tumors. By defining the chromatin accessibility ‘signature’ associated with each  
103 group, we identified DNA sequence motifs for specific transcription factors. SOX9 motifs were  
104 most accessible in group 1 tumors, and FOXA1 motifs were most accessible in HR+ tumors  
105 within groups 2 and 3. Finally, we found that expression for the chromatin factor ANP32E was  
106 anti-correlated with tumor progression and with accessibility at FOXA1 binding sites among  
107 group 2 and 3 tumors, suggestive of a novel mechanism by which FOXA1 activity may be  
108 regulated in breast cancer tumors. Our results highlight the potential for future disease focused  
109 studies of chromatin accessibility, as well as epigenetic therapies directed at disrupting  
110 chromatin regulatory factors.

111

## 112 **Materials and Methods:**

### 113 Measurements of Chromatin Accessibility, Gene Expression and Classification of Tumors

114 ATAC-Seq datasets were downloaded from TCGA-BRCA project in the National Cancer  
115 Institute’s (NCI) Genomic Data Commons (GDC) (18). Datasets were downloaded as bam files,  
116 sorted, and read count normalized with DeepTools (v3.1.3) (bamCoverage -bs 10) (19). MACS2  
117 (v2.1.4) was used for peak calls (bdgpeakcall -c 35 -g 100 -l 100) (20). A union peak set was  
118 generated containing all peaks across datasets (n=245133), and accessibility in these regions  
119 was scored for all tumors. Gene expression datasets were also downloaded from the TCGA-  
120 BRCA project. The expression files were downloaded as tables and matched to ATAC-Seq with  
121 Case ID. All 1222 expression files available in the TCGA-BRCA project were also combined into  
122 a union expression table. Tumor stage and IHC subtype were extracted from the TCGA-BRCA  
123 project in the NCI’s GDC. PAM50 subtype (21), histological subtype (22), and general patient  
124 demographics (22) data were obtained in cBioPortal (23, 24).

### 125 Unsupervised Dimensional Reduction and Clustering

126 The union peak table (described above) was uploaded into R and scores were normalized by  
127 ranking regions from minimum to maximum accessibility for each tumor. This table was then  
128 input into UMAP package (n\_neighbors=10) (25). UMAP output three tumor groups by  
129 agnostically grouping tumors based on similarities in chromatin accessibility patterns. To identify  
130 regions where accessibility differences occurred, log<sub>2</sub>FC values were calculated from a region’s  
131 average accessibility within a tumor group compared with its accessibility in all other tumors.  
132 Signatures 1, 2 and 3 consisted of regions with a log<sub>2</sub>FC greater than 2.5 for groups 1, 2 and 3,

133 respectively. Tumors were considered individually rather than as replicates, and therefore  
134 significance measurements were not assessed in defining divergent accessibility or gene  
135 expression groups.

#### 136 Data Visualization

137 The pheatmap package in R was used to create heatmaps of chromatin accessibility and gene  
138 expression, annotated by tumor characteristics. The ggplot2 package was used to create  
139 scatterplots and superimpose characteristics, such as cancer type, on UMAP plots. Integrative  
140 Genomics Viewer (IGV) (26) was used to visualize chromatin accessibility in tumor groups and  
141 stages. DeepTools was used to create heatmaps of accessibility and ChIP-Seq binding across  
142 regions. The Hg38 genome assembly was used.

#### 143 Annotation of Chromatin Signatures and Gene Ontology Analyses

144 HOMER (v4.10) was used to annotate and find motifs enriched in each chromatin signature  
145 (see above) (27), and group accessibility trends at those motifs were subsequently determined.

146 Gene ontologies for chromatin regions were determined with GREAT, which associates regions  
147 to any gene whose TSS is within 1000 kb (28). Gene ontologies for genes from divergent gene  
148 expression analyses were determined with Enrichr (29, 30).

#### 149 Analysis of MCF-7 ChIP-Seq

150 Encode was used to download ChIP-Seq data from the MCF-7 cell line for FOXA1  
151 (ENCSR126YEB), H3K27ac (ENCSR752UOD), H2A.Z (ENCSR057MWG) and ER  
152 (ENCSR463GOT) (31, 32). BigWig files of log<sub>2</sub>FC over control were downloaded from the  
153 ENCODE portal with the following identifiers: ENCFF795BHZ (FOXA1), ENCFF063VLJ  
154 (H3K27ac), ENCFF589PLM (H2A.Z), and ENCFF237WTX (ER).

#### 155 GSEA

156 Using the union expression dataset, tables of tumors in the top and bottom decile of *ANP32E*  
157 expression were generated. In order to associate gene ontologies with *ANP32E* expression, the  
158 average gene expressions of the top and bottom deciles were input into GSEA, which then  
159 converted normalized counts data to ranked lists for enrichment scoring (33, 34). To isolate this  
160 effect from *ANP32E*'s association with Basal-L tumors, we sought to eliminate the Basal-L  
161 subtype. Using expression of *FOXA1* and *GATA3*, two PAM50 markers, we removed the tumors  
162 that were in the bottom quartile of expression for both genes. Testing this method on the 74  
163 known tumors, this results in 14 tumors being eliminated. 10 of the 12 known Basal-L tumors  
164 were removed, and 12 of the 14 tumors removed were in group 1. Since this method was shown  
165 to be effective in removing the majority of Basal-L tumors from the sample, we applied it to all  
166 tumors in the TCGA-BRCA project. This resulted in removing 112 of the 1222 expression files  
167 available. We then repeated the GSEA analysis with this subset of tumors.

168 Statistical analyses were done with R statistical software (v3.6.3), and p-values obtained are  
169 from parametric t-tests. Log<sub>2</sub> fold-change values were calculated with a pseudo-count of 1.

170

171

172

173

## 174 **Results:**

### 175 Patterns of Chromatin Accessibility Segregate Breast Tumors into Distinct Subtypes

176 Chromatin accessibility has been used for defining cell identities, for establishing tissues of  
177 origin, and for measuring developmental cell-state transitions (35–38). We therefore sought to  
178 identify similarities and differences in chromatin state comparing between breast tumors.  
179 Chromatin accessibility maps were previously generated for 74 primary invasive breast  
180 carcinomas using ATAC-Seq, as part of TCGA-BRCA project (2, 39). Sequence data  
181 (downloaded from the Genome Data Commons - [gdc.cancer.gov](https://gdc.cancer.gov)) were normalized based on  
182 total mapped reads, and enriched ‘peaks’ of high accessibility were identified using MACS2 (20)  
183 (245133 union peaks). Uniform Manifold Approximation and Projection (UMAP) (25) was then  
184 used to group individual tumors based on chromatin accessibility patterns, wherein tumors  
185 segregated into three distinct groups (Fig. 1A), with no obvious differences in demographics  
186 between groups (Fig. S1A & S1B). Most chromatin differences occurred along UMAP dimension  
187 2, where tumors within group 1 bore the greatest distinction from groups 2 and 3 (Fig. 1A).

188 We next compared the chromatin-based UMAP classification with existing IHC and PAM50  
189 classifications. We found that group 1 included nearly all TNBC and all Basal-L tumors, whereas  
190 all HER2+ tumors (either by IHC or PAM50 classification) were within group 2. HR+/HER2-  
191 tumors, however, were distributed across all three groups (Fig. 1A – middle). Perhaps not  
192 surprisingly, the chromatin-based UMAP classification better reflected the intrinsic tumor  
193 subtypes that are based on gene expression (PAM50 classification) rather than the pathologic  
194 classification. For example, Basal-L tumors were found within group 1, and nearly all HER2-  
195 enriched and Lum-B tumors were within group 2 (Fig. 1A-right). Interestingly however, a subset  
196 of Lum-A tumors (and 1 Lum-B) were classified as a distinct set of tumors within group 3 (Fig.  
197 1A-right) (analyzed subsequently).

198 We further examined the relationship between the chromatin-based classification and other  
199 known features, including the frequency of common mutations and the expression of key genes.  
200 As expected (given the enrichment of TNBC/Basal-L tumors in group 1) mutations in *TP53* were  
201 over-represented in group 1, whereas mutations in *PIK3CA*, *GATA3* and *CDH1* were  
202 underrepresented (Fig. S1C). Likewise, (given the relationship to PAM50 subtype) expression of  
203 *FZD7*, *SOX9*, and *MYC* was higher for tumors within group 1, whereas tumors in group 2 and 3  
204 had higher expression of *FOXA1* and *GATA3* (Fig. S2A & S2B).

205 The above data indicated that features of chromatin accessibility may promote discrete tumor  
206 phenotypes, but chromatin patterns are nevertheless distinct from gene expression or  
207 histopathology-based phenotypes, suggesting that the chromatin differences may represent  
208 unique tumor behavior or underlying biology differences. In this regard, two classes stood out.  
209 HR+/HER2- tumors, which were distributed across all three groups, and Lum-A tumors, which  
210 were split between groups 2 and 3. To further investigate the nature of these differences, we  
211 compared the transcriptomes of those HR+/HER2- tumors that clustered in group 1 with  
212 HR+/HER2- tumors outside of group 1. Rather than grouping tumor samples as ‘replicates’, we  
213 compared average gene expression levels between UMAP groups and assessed statistical  
214 significance in downstream steps. Using this approach, we identified more than 4000 genes with  
215 divergent expression ( $\text{Log}_2\text{FC} > 1$ ) (Fig. 1D). As expected, (based on results in Fig 1A) gene  
216 ontology (GO) analysis indicated that genes involved in hormone signaling tended to be under-  
217 expressed in the HR+/HER2- tumors in group 1 relative to those in the other two groups (Fig.  
218 1E). Among these, expression of *ESR1*, *PR*, and *ERBB2*, as well as androgen receptor (*AR*)  
219 (Fig. S2C) showed reduced expression in group 1 tumors relative to those in groups 2 and 3,



220 and these HR+/HER2- tumors were more similar in the expression of these genes to group 1  
221 tumors classified as TNBC by IHC. These data suggest that chromatin-based classification may  
222 be a more accurate reflection of tumor phenotype, and that differences in classification may  
223 reflect heterogeneity of HR protein expression, variation in how (low vs. no) HR protein  
224 expression is stratified by different sites/pathologists, particularly for ER, and/or differences in  
225 mRNA vs. protein-based determination. Consistent with this idea, *ESR1* expression in group 1  
226 HR+/HER2- tumors was not only lower than that in HR+ tumors from other groups, but also  
227 exhibited greater variation than tumors determined to be TNBC (i.e. and thus ER-) (Fig. S2C).

228 As noted above, our chromatin-based classification distinguished a subset of Lum-A tumors (8  
229 of 24) as a distinct group (group 3). There were no apparent differences in the expression of the  
230 classic biomarker genes (*ESR1*, *PR*, *ERBB2*) or AR (Fig. S2D) between Lum-A tumors in  
231 groups 2 vs. those in group 3. We identified 523 genes with divergent expression between  
232 group 2 vs. group 3 Lum-A tumors (Fig. 1F). Interestingly, these differences largely reflected  
233 dysregulation of genes involved in humoral immune response and inflammatory pathways  
234 (which were enriched and depleted) respectively in Lum-A tumors within group 3 (Fig. 1G).  
235 Taken together, these data suggest that the chromatin state differences in breast cancer occur  
236 largely in Basal-L tumors (as compared with non-Basal-L tumors) and within a distinct subset of  
237 Lum-A tumors, potentially resulting from immune evasion (40).

238

### 239 Accessibility Differences at a Subset of “Signature” Regions Underlie Tumor Groups

240 To gain further insight into the factors driving group classification, we identified the genomic  
241 regions where high levels of accessibility were present for tumors within each respective group,  
242 as compared with all other tumors ( $\text{Log}_2\text{FC} > 2.5$ ). This enabled us to define a set of accessible  
243 loci (signature regions) which independently partitioned tumors in a manner nearly identical to  
244 UMAP grouping (Fig. 2A & 2B). Interestingly, the signature sites for all 3 groups tended to be  
245 further away from the nearest annotated TSS (Fig. S3A) and less CpG rich (Fig. S3B), as  
246 compared with randomly-selected accessible peak regions, suggesting that they might  
247 represent distal regulatory elements. GREAT analysis (28) was then used to annotate the  
248 signature regions to all genes whose TSS were within 1000 kb in either direction (Fig. S3).  
249 Analysis of the genes near signature 1 sites indicated they were involved in exocrine gland  
250 development, which was not surprising given that all tumors within group 1 were Basal-L, and  
251 are therefore thought to arise from precursor cells within the basal layer of mammary exocrine  
252 glands. By contrast, signature 2 sites were located nearest to hormone responsive genes,  
253 consistent with the abundance of HR+ and Lum-A/B tumors in this group. Interestingly, genes  
254 associated with signature 3 sites were enriched in functions involved in cell metabolism (Fig.  
255 S3E), suggesting that a unique metabolic program may distinguish tumors in this group from  
256 those that otherwise bear a Lum-A gene expression signature.

257 As noted, the chromatin profiles segregated Lum-A tumors into two groups (Lum-A, group 2 vs  
258 group 3) (Fig. 1C). To gain further insight into the potential factors segregating these tumors, we  
259 applied a similar approach as above to identify regions of chromatin accessibility that differed  
260 between Lum-A tumors in group 2 and group 3, including sites outside our defined signature  
261 regions ( $\log_2\text{FC} > 2$ ,  $n=3360$ ) (Fig. 2C). Interestingly, GREAT gene ontology analysis (genes  
262 within 1000 kb) revealed that regions of greater accessibility in group 2 Lum-A tumors (lower in  
263 group 3) were annotated to genes involved in development and morphogenesis, whereas  
264 regions with greater accessibility in group 3 were annotated to genes involved in carbohydrate  
265 metabolism (Fig. 2D). These results provide further indication that a subset of Lum-A tumors  
266 may be programmed in a metabolically distinct manner based on differences in chromatin state.

267 Both the subset of Lum-A tumors in group 3, and group 3 tumors in general, were distinguished  
268 by features associated with immune (Fig. 1G) and metabolic regulation (Fig. 2D), similar to gene  
269 expression characteristics previously identified as distinguishing subsets of invasive lobular  
270 carcinomas (ILC) which exhibit a Lum-A intrinsic gene expression pattern upon PAM50  
271 subtyping (41–43). To investigate this further, we overlaid the tumor histology information  
272 extracted from the TCGA metadata for each tumor in the dataset along with the UMAP  
273 classification (Fig. 2E). We found that indeed, ILC was over-represented in group 3, relative to  
274 groups 1 and 2 (Fig. 2F). ILC is also characterized by high rates of CDH1 mutation, which were  
275 also found to be somewhat overrepresented in group 3 tumors (Fig. S1C). However, many (8 of  
276 14) lobular carcinomas also distributed to group 2, indicating that chromatin state differences  
277 occurred in a subset of lobular carcinomas, many of which were classified previously as Lum-A  
278 (Figs 1A & 1G).

279

### 280 Accessibility at FOX and SOX binding sites defines tumor groups

281 To better understand how chromatin changes might contribute to biologically distinct tumor  
282 properties, we next investigated the genomic context of the established signature regions. The  
283 gene-distal nature of these signature regions (Fig. S3A) suggests that they might function as  
284 intergenic regulatory sites. To investigate this possibility, we used HOMER (27) to identify DNA  
285 sequence motifs enriched in the signature regions, representing potential transcription factor  
286 binding sites. Several motifs were found to be enriched (Supplemental Table 1), as compared  
287 with background regions (consisting of 5000 randomly selected, similarly sized genome-wide  
288 accessible sites). SOX factor binding motifs were most enriched in signature 1 regions, FOX  
289 factor motifs were the most enriched in signature 2 regions, and CEBP motifs were the most  
290 enriched in signature 3 regions (Fig. 3A). To confirm that accessibility differences occurred  
291 directly over these candidate motifs, we next mapped motif locations within signatures 1, 2, and  
292 3, and assessed accessibility levels at these sites (Fig. 3B – top). Indeed, tumors in group 1  
293 had, on average, greater accessibility at SOX motifs, group 2 tumors had the highest  
294 accessibility at FOX motifs, and group 3 tumors had the highest accessibility at CEBP motifs.

295 Having identified DNA motifs enriched within each signature region, we next asked whether  
296 these motif locations were more broadly accessible throughout the genome, even when motifs  
297 were located outside our signature regions (Fig. 3B – bottom). Indeed, we found that genome-  
298 wide, accessibility at SOX motifs was highest in group 1 tumor samples, and at FOX motifs,  
299 accessibility was highest in group 2 samples (hormone positive tumors). Interestingly, the  
300 accessibility at SOX, FOX, and CEBP sites was lower for group 3 tumors, when compared with  
301 groups 1 and 2, suggesting that additional factors may underlie accessibility of the group 3  
302 tumors. We next compared the levels of gene expression to determine which among the FOX  
303 and SOX family transcription factors might be involved. Here we found that group 1 tumors  
304 tended to express high levels of *SOX9*, *FOXC1*, and *FOXM1* relative to tumors in groups 2 and  
305 3, whereas group 2 tumors expressed high levels of *FOXA1* (Fig. 3C & S4A). These results are  
306 well aligned with published studies indicating that *SOX9* and *FOXC1* play central roles in TNBC  
307 (within group 1), whereas *FOXA1* status and levels are mediators of outcome and programming  
308 among ER+ breast tumors (mostly in group 2) (11, 12, 14).

309 HR+ breast cancers in groups 2 and 3 expressed higher levels of *FOXA1* (Fig. S4A) and  
310 exhibited greater chromatin accessibility over FOX factor sequence motifs (Fig. 3B). Prior  
311 studies indicate that *FOXA1* function in conjunction with ER to influence enhancer activity and  
312 promote pro-metastatic transcriptional programming in breast cancer cell lines (14, 15). We  
313 therefore determined the relationship between chromatin grouping and tumor progression.  
314 Indeed, we found that average chromatin accessibility levels at the signature regions defining

315 groups 1-3 were associated with tumor stage (Fig. 4A-C). Notably, at signature 2 regions, which  
316 are enriched for FOX motifs (Fig. 3A), there was a strong relationship between accessibility and  
317 tumor stage, with progressively greater accessibility associated with increasing severity of  
318 disease (Fig. 4C & S4B). There was a nonsignificant trend towards decreased accessibility at  
319 signature 3 sites with increasing stage of disease. Signature 1 sites showed the greatest  
320 accessibility in early stage (stage I and II), suggesting that among Basal-L/TNBC breast cancers  
321 such sites may underlie the early stages of disease.

322 The observation that signature 2 regions were positively associated with increasing tumor stage  
323 among group 2 tumors (Fig. 4A) was recapitulated in our analysis of accessibility at FOX motifs  
324 across all accessible sites for the 74 tumors in the dataset (n=96,280) (Fig. 4D & S4C). Here we  
325 found again that accessibility of FOX motifs among all accessible sites is positively correlated  
326 with tumor stage, despite no apparent differences in *FOXA1* gene expression between tumors  
327 of different stages (Fig. 4E). Similar to what was observed for differences in accessibility at  
328 FOX motifs (Fig. 3D), we noted a trend towards greater accessibility at FOX motifs among Lum-  
329 A or lobular carcinomas in group 2 vs. group 3. Regardless of whether we focused on Lum-A or  
330 lobular tumors, those in group 2 had higher accessibility levels than tumors in group 3 (Fig.  
331 S4D) – despite no apparent differences in *FOXA1* expression levels (Fig. S4E).

332 Cognizant of the previously described relationship between ER and FOXA1 binding at distal  
333 enhancer elements in breast cancer cells (as discussed above (14, 15)), we next investigated  
334 histone modifications at the accessible signature regions. Using publicly available chromatin  
335 immunoprecipitation data from MCF-7 cells (31, 32), we found that FOXA1, ER, and H3K27ac  
336 (a marker of active enhancers) are significantly enriched at signature 2 regions, as compared  
337 with accessible regions that define groups 1 or 3 (Fig. 5A). This high level of co-occurrence  
338 suggests that the co-binding of FOXA1 and ER may underlie the chromatin-based segregation  
339 in HR+/Lum-A/lobular carcinomas between groups 2 vs. 3. When considered together, these  
340 results suggest that chromatin accessibility at FOX factor binding motifs increases with tumor  
341 progression, and this mechanism underlie distinguishing chromatin patterns in group 2 verses  
342 group 3 tumors.

343

#### 344 *ANP32E* Expression Levels are Associated with Accessibility at FOX Motifs

345 The above data indicate that accessibility of FOX motifs is generally associated with tumor  
346 stage, but we find little evidence for differences in *FOXA1* (or *ESR1*) expression levels between  
347 tumors of different stages, suggesting that additional factors may contribute to accessibility at  
348 FOX binding motifs. Prior studies of HR+ breast cancer cells have demonstrated that the  
349 function of FOXA1 is impacted by the local enrichment of the histone variant H2A.Z (44, 45).  
350 H2A.Z accumulates at estrogen response elements that are bound by FOXA1 and loss of  
351 H2A.Z impairs both FOXA1 binding and polymerase recruitment. ANP32E is a chromatin  
352 chaperone that regulates the genomic localization of H2A.Z to control locus-specific chromatin  
353 state dynamics (16). In recent work, we showed that ANP32E antagonizes H2A.Z installation,  
354 such that ANP32E loss causes a global increased H2A.Z enrichment, heightened chromatin  
355 accessibility and amplified TF-binding at open sites, in cultured mouse fibroblasts (16). ANP32E  
356 may function similarly in breast tumors, influencing the binding of key oncogenic transcription  
357 factors, like FOXA1. Therefore, we investigated the relationship between *ANP32E* expression,  
358 chromatin accessibility, and tumor characteristics across the chromatin-defined tumor groups  
359 (Fig. 5B). We found that *ANP32E* expression was generally higher in group 1 tumors than  
360 groups 2 and 3 (Fig. 5B & S5A), and consistent with a prior report looking at protein levels (17),  
361 ANP32E was significantly higher in Basal-L tumors (within group 1) than the other PAM50  
362 subtypes (Fig. 5B & S5B). Moreover, the levels of *ANP32E* expression tended to stratify tumors



363 by stage, wherein early-stage (I, II) tumors had the highest levels of *ANP32E* expression and  
364 late-stage (III, IV) tumors had the lowest levels (Fig. 5B, 5C & S5C). This association was  
365 maintained even when group 1 tumors were excluded (Fig. 5D & S5D), indicating that *ANP32E*  
366 levels may be functionally involved in cancer progression independent of tumor subtype.

367 We next evaluated the relationship between *ANP32E* expression and accessibility. We found  
368 that accessibility at signature 2 regions (Fig. 5E) or all accessible FOXA1 motifs (Fig. 5F) were  
369 significantly anticorrelated with levels of *ANP32E* expression across all tumors (signature 2: R=  
370 -0.409, p=0.0003; FOX motifs: R= -0.276, p=0.017), suggesting that *ANP32E* may indeed  
371 function as a negative regulator of chromatin accessibility at these sites. Notably, signature 2  
372 regions had the highest levels of H2A.Z in MCF-7 cells (Fig. S5E), and the negative relationship  
373 between *ANP32E* expression and accessibility was specific to signature 2 (Fig. S5F & S5G).

374

### 375 *ANP32E* Expression Levels are Associated with DNA Replication and Immune Response

376 Based on our findings that reduced *ANP32E* expression levels associated with tumor stage  
377 progression, we next sought to determine the relationship between *ANP32E* expression and  
378 tumor phenotype, using the tumor transcriptome as a read-out. For this analysis, we first  
379 identified tumors in the top and bottom deciles of *ANP32E* expression (n=123) among all breast  
380 tumors from the TCGA-BRCA project for which RNA-Seq data were available (n=1222). Then,  
381 we used GSEA to investigate the ontologies of these transcriptomic shifts associated with  
382 *ANP32E* expression levels. We found that high *ANP32E* expression was associated with  
383 increased expression of genes involved in the immune response (Fig. 6A) and to a lesser extent  
384 DNA replication (Fig. S6A). Consistent with this idea, *Ki67* expression, a marker of cellular  
385 proliferation (46), was highest in group 1 tumors (representing all Basal-L and most TNBC  
386 tumors) (Fig. 6B), and *ANP32E* and *Ki67* levels were positively correlated across all samples  
387 analyzed, but not after removing group 1 (Basal-L) tumors (Fig. 6C). Conversely, low *ANP32E*  
388 expression was associated with increased expression of genes involved in separate  
389 developmental processes (eg. 'Keratinocyte Differentiation' and 'Cilium Movement'). To test  
390 whether the observed gene expression associations were driven by differences between Basal-  
391 L and non-Basal-L tumors, we repeated these analyses exclusively assaying tumors classified  
392 as non-Basal-L (see methods). Here again we found that high *ANP32E* expression was  
393 associated with genes involved in DNA replication and immune response (Fig. 6D & S6B),  
394 indicating that the observed GSEA results were not simply the outcome of tumor subtype gene  
395 expression differences.

396 Taken together, these results suggest that *ANP32E* may generally function to restrict chromatin  
397 changes at the beginning stages of tumor development, and loss of *ANP32E* promotes tumor  
398 progression by enabling more aggressive cancer. In this regard *ANP32E* may act to 'lock in' a  
399 defined chromatin state, and when tumor cells transition to later stages of cancer progression,  
400 *ANP32E* becomes downregulated, leading to increased chromatin accessibility at a defined set  
401 of gene regulatory regions, including sites where H3K27ac and H2A.Z are enriched, enhancer  
402 elements, and FOXA1 binding sites.

403

### 404 **Discussion:**

405 We set out to investigate how differences in chromatin state across separate breast tumors  
406 coincided with unique characteristics of cancer biology, and to investigate whether differences in  
407 chromatin patterns could provide insight into new cancer mechanisms. To test whether  
408 chromatin accessibility patterns differed in a biologically meaningful manner, we took an

409 unsupervised approach, using a dimensional reduction method (UMAP) to group tumors based  
410 only on chromatin differences. With this approach, 74 breast cancer tumors were grouped into  
411 three distinct UMAP categories. Supporting the validity of our UMAP approach, we found that  
412 differences in chromatin patterns associated with several known breast cancer features,  
413 including IHC marker status (Fig. 1B), PAM50 subtype classification (Fig. 1C), and histological  
414 classification (Fig. 2F). We also uncovered several novel chromatin associations. For example,  
415 our UMAP analysis indicated that 6 HR+/HER2- tumors were more similar to TNBC tumors (Fig.  
416 1A), and these tumors were distinct from other HR+/HER2- tumors. Further characterization  
417 revealed that these 6 samples, along with TNBC samples, were classified as Basal-L,  
418 suggesting that the chromatin state of Basal-L tumors drove the UMAP segregation patterns,  
419 rather than chromatin associations with IHC marker status. Differences in tumor heterogeneity  
420 may contribute to these differences in grouping and IHC status. For example, HR+/HER2-  
421 tumors with non-uniform IHC staining may be more similar to TNBC tumors when considered in  
422 aggregate than homogeneously stained HR+/HER2- tumors. Another interesting possibility is  
423 that a subset of HR+/HER2- tumors may be mechanistically more similar to TNBC-like tumors,  
424 perhaps explaining why a subset of HR+/HER2- tumors are resistant to hormone therapies (47).  
425 More comprehensive and longitudinal studies of breast cancer, measuring chromatin state  
426 changes along with IHC status and gene expression profiling, will help in establishing which of  
427 these possibilities account for the observed UMAP grouping. In the future, additional diagnostic  
428 tests of HR+/HER2- tumors may be necessary to assess intrinsic cell-type of origin, potentially  
429 strengthening predictions of therapy response.

430 We also found chromatin differences occurred in a subset of Lum-A tumors, which appeared to  
431 have chromatin patterns more similar to non-Lum-A tumors within UMAP group 2 (including  
432 Lum-B and HER2-enriched tumors). This subset had reduced expression for genes involved in  
433 immune response (Fig. 1G) and reduced accessibility at regions proximal to metabolism genes  
434 (Fig. 2D), despite no measurable difference in expression for typical breast cancer markers,  
435 such as *PR*, *ESR1*, and *ERBB2* (Fig. S2E). We observed similar patterns for lobular tumors,  
436 which also segregated into two classes (Fig. 2E & 2F), with a subset of lobular tumors grouping  
437 with ductal tumors (within UMAP group 2). Previous studies examining differences in Lum-A  
438 carcinomas found that pathways similar to those active in group 3 tumors were also active in  
439 ILC (as compared with ductal carcinoma), including immune-related and metabolic pathways  
440 (43). In this context, our results suggest that group 3 may represent invasive carcinomas, similar  
441 to those described previously (41–43). Indeed, prior studies found that ILC had decreased  
442 FOXA1 activity (based on measurements of gene expression and mutation frequency) (41), and  
443 in our study, we found lower chromatin accessibility levels at FOXA1 binding sites in group 3  
444 tumors, which we presume to be of this same ILC subtype (Fig. 3B). In sum, our results support  
445 a model where loss of FOXA1 activity (and subsequent loss of DNA binding) in luminal tumors  
446 distinguishes ILC from other HR+ tumors (presumably occurring within UMAP group 2).

447 We found the tumors within UMAP group 2 to be particularly interesting, as several distinct  
448 cancer subtypes grouped together, indicating that they had quite similar chromatin accessibility  
449 patterns despite differences in clinical classifications. Interestingly, FOX motifs were enriched  
450 within the genomic loci where accessibility differences distinguished group 2 tumors (Fig. 3A &  
451 3B) and these loci were located distal from gene promoters (Fig. S3A). In MCF-7 breast cancer  
452 cells, these regions are bound by FOXA1 and ER, and enriched for H2A.Z and H3K27ac (Fig.  
453 S5E & 5A), suggesting that they may function as enhancer elements in HR+ breast cancer  
454 tumors. Prior studies have demonstrated that H2A.Z levels at ER binding sites facilitates  
455 enhancer activation and FOXA1 binding in this type of (HR+) breast cancer cell (44, 45). We  
456 and others previously demonstrated that H2A.Z is a negative regulator of DNA methylation (48–  
457 50), and accordingly, lower DNA methylation levels are known to occur at enhancers bound by

458 FOXA1 and ER in luminal tumors (compared with basal tumors) (51). Additionally, increased  
459 FOXA1 activity has been shown to function in the activation of pro-metastatic cellular  
460 programming (14). Taken together, these results suggest that increased H2A.Z levels at  
461 enhancers in luminal tumors may promoter increased accessibility, improved FOXA1 binding,  
462 and amplified enhancer activity, potentially driving tumors toward a more metastatic cellular  
463 program without changing FOXA1 expression levels (Fig. 6E).

464 The histone chaperone ANP32E has previously been shown to control H2A.Z levels at  
465 thousands of vertebrate gene regulatory regions, including enhancers (16, 48, 52, 53). We  
466 previously found that ANP32E functions in mouse cells to control genome-wide chromatin  
467 accessibility through regulation of H2A.Z patterns (16). Based on this mechanism, differences in  
468 ANP32E levels among breast tumors may lead to differences in H2A.Z enrichment, causing  
469 chromatin accessibility differences, and ultimately impacting transcription factor binding events.  
470 In the context of this study, we do indeed find that ANP32E expression levels differ among  
471 tumors, and these differences are anticorrelated with chromatin accessibility at FOX factor  
472 binding sites. Interestingly, accessibility at these same sites tends to increase in later-stage  
473 tumors (stage III, IV), compared with earlier stages (stage I, II), suggesting that selective  
474 opening of signature 2 regions, and FOX binding in particular may function to promote tumor  
475 progression. In this regard, ANP32E levels in HR+ tumors may specifically restrict chromatin  
476 accessibility at FOX factor motifs (Fig. 6E). Additional mechanistic studies of ANP32E, H2A.Z  
477 and its role in FOX factor binding in the context of HR+ breast cancer will be necessary to  
478 further investigate this possibility.

479 It is important to note that our study investigated accessibility data from primary tumor samples  
480 only. In this context, our ability to identify significant correlations between stage at resection and  
481 chromatin accessibility suggests that changes in the chromatin state of the primary tumor may  
482 precede, and/or be predictive of, the propensity for tumor progression and/or metastatic spread.  
483 We therefore propose a model in which ANP32E has two separate functions in breast cancer,  
484 depending on tumor subtype or the differentiation state of the cell of origin. In Basal-L/TNBC  
485 tumors, largely believed to arise from a more stem-like multipotent progenitor, high levels of  
486 ANP32E 'lock-in' a pattern of accessible chromatin that favors proliferation and self-renewal,  
487 while in HR+ breast tumors, arising in a more differentiated luminal progenitor, ANP32E  
488 supports the maintenance of luminal identity and hormone responsiveness by restricting FOXA1  
489 binding at estrogen response elements (Fig. 6E). In this latter setting, the loss of ANP32E  
490 expression may lead to increased FOXA1 binding, relaxation of cellular programming, and  
491 progression to a hormone-resistant state. Indeed, factors affecting the balance of ER and  
492 FOXA1 binding to estrogen response elements, such as forced overexpression of FOXA1, may  
493 promote expression of genes involved in metastasis and endocrine-resistant breast cancers  
494 (14). Future studies addressing the role of ANP32E, H2A.Z, and their role in FOX factor binding  
495 in the context of HR+ breast cancer are necessary to further investigate this possibility.

496

#### 497 **Acknowledgements:**

498 The results published here are in whole or part based upon data generated by the TCGA  
499 Research Network: <https://www.cancer.gov/tcga>. TCGA-BRCA dbGaP Study Accession:  
500 phs000178.v11.p8.

#### 501 **Conflicts of Interest:**

502 Authors declare there are no conflicts of interest.

503 **Funding:**

504 Funding for this research was from NIGMS R35-GM137833 to PJM and R01-CA250531 to  
505 PMV.

506

507

508 **Literature Cited:**

509 1. Klemm,S.L., Shipony,Z. and Greenleaf,W.J. (2019) Chromatin accessibility and the regulatory  
510 epigenome. *Nature Reviews Genetics*, **20**, 207–220.

511 2. Corces,M.R., Granja,J.M., Shams,S., Louie,B.H., Seoane,J.A., Zhou,W., Silva,T.C., Groeneveld,C.,  
512 Wong,C.K., Cho,S.W., *et al.* (2018) The chromatin accessibility landscape of primary human  
513 cancers. *Science*, **362**.

514 3. Domcke,S., Hill,A.J., Daza,R.M., Cao,J., O’Day,D.R., Pliner,H.A., Aldinger,K.A., Pokholok,D., Zhang,F.,  
515 Milbank,J.H., *et al.* (2020) A human cell atlas of fetal chromatin accessibility. *Science*, **370**,  
516 eaba7612.

517 4. Ferlay,J., Colombet,M., Soerjomataram,I., Mathers,C., Parkin,D.M., Piñeros,M., Znaor,A. and Bray,F.  
518 (2019) Estimating the global cancer incidence and mortality in 2018: GLOBOCAN sources and  
519 methods. *International Journal of Cancer*, **144**, 1941–1953.

520 5. Harbeck,N., Penault-Llorca,F., Cortes,J., Gnant,M., Houssami,N., Poortmans,P., Ruddy,K., Tsang,J. and  
521 Cardoso,F. (2019) Breast cancer. *Nature Reviews Disease Primers*, **5**, 1–31.

522 6. Barwick,B.G., Gupta,V.A., Matulis,S.M., Patton,J.C., Powell,D.R., Gu,Y., Jaye,D.L., Conneely,K.N.,  
523 Lin,Y.C., Hofmeister,C.C., *et al.* (2021) Chromatin Accessibility Identifies Regulatory Elements  
524 Predictive of Gene Expression and Disease Outcome in Multiple Myeloma. *Clin Cancer Res*, **27**,  
525 3178–3189.

526 7. Foulkes,W.D., Smith,I.E. and Reis-Filho,J.S. (2010) Triple-Negative Breast Cancer. *New England Journal*  
527 *of Medicine*, **363**, 1938–1948.

528 8. Parker,J.S., Mullins,M., Cheang,M.C.U., Leung,S., Voduc,D., Vickery,T., Davies,S., Fauron,C., He,X.,  
529 Hu,Z., *et al.* (2009) Supervised Risk Predictor of Breast Cancer Based on Intrinsic Subtypes. *J Clin*  
530 *Oncol*, **27**, 1160–1167.

531 9. Xu,P., Yu,H.V., Tseng,K.-C., Flath,M., Fabian,P., Segil,N. and Crump,J.G. (2021) Foxc1 establishes  
532 enhancer accessibility for craniofacial cartilage differentiation. *eLife*, **10**, e63595.

533 10. Schock,E.N. and LaBonne,C. (2020) Sorting Sox: Diverse Roles for Sox Transcription Factors During  
534 Neural Crest and Craniofacial Development. *Front Physiol*, **11**, 606889.

535 11. Tang,L., Jin,J., Xu,K., Wang,X., Tang,J. and Guan,X. (2020) SOX9 interacts with FOXC1 to activate MYC  
536 and regulate CDK7 inhibitor sensitivity in triple-negative breast cancer. *Oncogenesis*, **9**, 1–12.



- 537 12. Bernardo, G.M., Bebek, G., Ginther, C.L., Sizemore, S.T., Lozada, K.L., Miedler, J.D., Anderson, L.A.,  
538 Godwin, A.K., Abdul-Karim, F.W., Slamon, D.J., *et al.* (2013) FOXA1 represses the molecular  
539 phenotype of basal breast cancer cells. *Oncogene*, **32**, 554–563.
- 540 13. Pellacani, D., Tan, S., Lefort, S. and Eaves, C.J. (2019) Transcriptional regulation of normal human  
541 mammary cell heterogeneity and its perturbation in breast cancer. *EMBO J*, **38**, e100330.
- 542 14. Fu, X., Pereira, R., Angelis, C.D., Veeraraghavan, J., Nanda, S., Qin, L., Cataldo, M.L., Sethunath, V.,  
543 Mehravar, S., Gutierrez, C., *et al.* (2019) FOXA1 upregulation promotes enhancer and  
544 transcriptional reprogramming in endocrine-resistant breast cancer. *PNAS*, **116**, 26823–26834.
- 545 15. Ross-Innes, C.S., Stark, R., Teschendorff, A.E., Holmes, K.A., Ali, H.R., Dunning, M.J., Brown, G.D., Gojis, O.,  
546 Ellis, I.O., Green, A.R., *et al.* (2012) Differential oestrogen receptor binding is associated with  
547 clinical outcome in breast cancer. *Nature*, **481**, 389–393.
- 548 16. Murphy, K.E., Meng, F.W., Makowski, C.E. and Murphy, P.J. (2020) Genome-wide chromatin  
549 accessibility is restricted by ANP32E. *Nature Communications*, **11**, 5063.
- 550 17. Xiong, Z., Ye, L., Zhenyu, H., Li, F., Xiong, Y., Lin, C., Wu, X., Deng, G., Shi, W., Song, L., *et al.* (2018) ANP32E  
551 induces tumorigenesis of triple-negative breast cancer cells by upregulating E2F1. *Mol Oncol*, **12**,  
552 896–912.
- 553 18. Grossman, R.L., Heath, A.P., Ferretti, V., Varmus, H.E., Lowy, D.R., Kibbe, W.A. and Staudt, L.M. (2016)  
554 Toward a Shared Vision for Cancer Genomic Data. *New England Journal of Medicine*, **375**, 1109–  
555 1112.
- 556 19. Ramírez, F., Dündar, F., Diehl, S., Grüning, B.A. and Manke, T. (2014) deepTools: a flexible platform for  
557 exploring deep-sequencing data. *Nucleic Acids Research*, **42**, W187–W191.
- 558 20. Zhang, Y., Liu, T., Meyer, C.A., Eeckhoute, J., Johnson, D.S., Bernstein, B.E., Nusbaum, C., Myers, R.M.,  
559 Brown, M., Li, W., *et al.* (2008) Model-based Analysis of ChIP-Seq (MACS). *Genome Biology*, **9**,  
560 R137.
- 561 21. Koboldt, D.C., Fulton, R.S., McLellan, M.D., Schmidt, H., Kalicki-Veizer, J., McMichael, J.F., Fulton, L.L.,  
562 Dooling, D.J., Ding, L., Mardis, E.R., *et al.* (2012) Comprehensive molecular portraits of human  
563 breast tumours. *Nature*, **490**, 61–70.
- 564 22. Broad Institute TCGA Genome Data Analysis Center (2016): Firehose stddata\_2016\_01\_28 run. Broad  
565 Institute of MIT and Harvard. doi:10.7908/C11G0KM9.
- 566 23. Cerami, E., Gao, J., Dogrusoz, U., Gross, B.E., Sumer, S.O., Aksoy, B.A., Jacobsen, A., Byrne, C.J.,  
567 Heuer, M.L., Larsson, E., *et al.* (2012) The cBio cancer genomics portal: an open platform for  
568 exploring multidimensional cancer genomics data. *Cancer Discov*, **2**, 401–404.
- 569 24. Gao, J., Aksoy, B.A., Dogrusoz, U., Dresdner, G., Gross, B., Sumer, S.O., Sun, Y., Jacobsen, A., Sinha, R.,  
570 Larsson, E., *et al.* (2013) Integrative analysis of complex cancer genomics and clinical profiles  
571 using the cBioPortal. *Sci Signal*, **6**, pl1.

- 572 25. McInnes, L., Healy, J. and Melville, J. (2020) UMAP: Uniform Manifold Approximation and Projection  
573 for Dimension Reduction. *arXiv:1802.03426 [cs, stat]*.
- 574 26. Robinson, J.T., Thorvaldsdóttir, H., Winckler, W., Guttman, M., Lander, E.S., Getz, G. and Mesirov, J.P.  
575 (2011) Integrative genomics viewer. *Nat Biotechnol*, **29**, 24–26.
- 576 27. Heinz, S., Benner, C., Spann, N., Bertolino, E., Lin, Y.C., Laslo, P., Cheng, J.X., Murre, C., Singh, H. and  
577 Glass, C.K. (2010) Simple combinations of lineage-determining transcription factors prime cis-  
578 regulatory elements required for macrophage and B cell identities. *Mol Cell*, **38**, 576–589.
- 579 28. McLean, C.Y., Bristor, D., Hiller, M., Clarke, S.L., Schaar, B.T., Lowe, C.B., Wenger, A.M. and Bejerano, G.  
580 (2010) GREAT improves functional interpretation of cis-regulatory regions. *Nat Biotechnol*, **28**,  
581 495–501.
- 582 29. Chen, E.Y., Tan, C.M., Kou, Y., Duan, Q., Wang, Z., Meirelles, G.V., Clark, N.R. and Ma’ayan, A. (2013)  
583 Enrichr: interactive and collaborative HTML5 gene list enrichment analysis tool. *BMC*  
584 *Bioinformatics*, **14**, 128.
- 585 30. Kuleshov, M.V., Jones, M.R., Rouillard, A.D., Fernandez, N.F., Duan, Q., Wang, Z., Koplev, S., Jenkins, S.L.,  
586 Jagodnik, K.M., Lachmann, A., *et al.* (2016) Enrichr: a comprehensive gene set enrichment  
587 analysis web server 2016 update. *Nucleic Acids Res*, **44**, W90-97.
- 588 31. Dunham, I., Kundaje, A., Aldred, S.F., Collins, P.J., Davis, C.A., Doyle, F., Epstein, C.B., Frietze, S., Harrow, J.,  
589 Kaul, R., *et al.* (2012) An integrated encyclopedia of DNA elements in the human genome.  
590 *Nature*, **489**, 57–74.
- 591 32. Sloan, C.A., Chan, E.T., Davidson, J.M., Malladi, V.S., Strattan, J.S., Hitz, B.C., Gabdank, I., Narayanan, A.K.,  
592 Ho, M., Lee, B.T., *et al.* (2016) ENCODE data at the ENCODE portal. *Nucleic Acids Research*, **44**,  
593 D726–D732.
- 594 33. Subramanian, A., Tamayo, P., Mootha, V.K., Mukherjee, S., Ebert, B.L., Gillette, M.A., Paulovich, A.,  
595 Pomeroy, S.L., Golub, T.R., Lander, E.S., *et al.* (2005) Gene set enrichment analysis: A knowledge-  
596 based approach for interpreting genome-wide expression profiles. *PNAS*, **102**, 15545–15550.
- 597 34. Mootha, V.K., Lindgren, C.M., Eriksson, K.-F., Subramanian, A., Sihag, S., Lehar, J., Puigserver, P.,  
598 Carlsson, E., Ridderstråle, M., Laurila, E., *et al.* (2003) PGC-1 $\alpha$ -responsive genes involved in  
599 oxidative phosphorylation are coordinately downregulated in human diabetes. *Nature Genetics*,  
600 **34**, 267–273.
- 601 35. Muto, Y., Wilson, P.C., Ledru, N., Wu, H., Dimke, H., Waikar, S.S. and Humphreys, B.D. (2021) Single cell  
602 transcriptional and chromatin accessibility profiling redefine cellular heterogeneity in the adult  
603 human kidney. *Nature Communications*, **12**, 2190.
- 604 36. Carter, B. and Zhao, K. (2021) The epigenetic basis of cellular heterogeneity. *Nature Reviews Genetics*,  
605 **22**, 235–250.
- 606 37. Meshorer, E. and Misteli, T. (2006) Chromatin in pluripotent embryonic stem cells and differentiation.  
607 *Nature Reviews Molecular Cell Biology*, **7**, 540–546.

- 608 38. Ho,Y.-T., Shimbo,T., Wijaya,E., Ouchi,Y., Takaki,E., Yamamoto,R., Kikuchi,Y., Kaneda,Y. and Tamai,K.  
609 (2018) Chromatin accessibility identifies diversity in mesenchymal stem cells from different  
610 tissue origins. *Scientific Reports*, **8**, 17765.
- 611 39. Buenrostro,J.D., Wu,B., Chang,H.Y. and Greenleaf,W.J. (2015) ATAC-seq: A Method for Assaying  
612 Chromatin Accessibility Genome-Wide. *Current Protocols in Molecular Biology*, **109**, 21.29.1-  
613 21.29.9.
- 614 40. Bates,J.P., Derakhshandeh,R., Jones,L. and Webb,T.J. (2018) Mechanisms of immune evasion in  
615 breast cancer. *BMC Cancer*, **18**, 556.
- 616 41. Ciriello,G., Gatz,M.L., Beck,A.H., Wilkerson,M.D., Rhee,S.K., Pastore,A., Zhang,H., McLellan,M.,  
617 Yau,C., Kandoth,C., *et al.* (2015) Comprehensive Molecular Portraits of Invasive Lobular Breast  
618 Cancer. *Cell*, **163**, 506–519.
- 619 42. Netanel,D., Avraham,A., Ben-Baruch,A., Evron,E. and Shamir,R. (2016) Expression and methylation  
620 patterns partition luminal-A breast tumors into distinct prognostic subgroups. *Breast Cancer  
621 Research*, **18**, 74.
- 622 43. Du,T., Zhu,L., Levine,K.M., Tasmir,N., Lee,A.V., Vignali,D.A.A., Houten,B.V., Tseng,G.C. and  
623 Oesterreich,S. (2018) Invasive lobular and ductal breast carcinoma differ in immune response,  
624 protein translation efficiency and metabolism. *Sci Rep*, **8**, 7205.
- 625 44. Gévry,N., Hardy,S., Jacques,P.-É., Laflamme,L., Svotelis,A., Robert,F. and Gaudreau,L. (2009) Histone  
626 H2A.Z is essential for estrogen receptor signaling. *Genes Dev.*, **23**, 1522–1533.
- 627 45. Brunelle,M., Nordell Markovits,A., Rodrigue,S., Lupien,M., Jacques,P.-É. and Gévry,N. (2015) The  
628 histone variant H2A.Z is an important regulator of enhancer activity. *Nucleic Acids Research*, **43**,  
629 9742–9756.
- 630 46. Pathmanathan,N. and Balleine,R.L. (2013) Ki67 and proliferation in breast cancer. *Journal of Clinical  
631 Pathology*, **66**, 512–516.
- 632 47. Garcia-Martinez,L., Zhang,Y., Nakata,Y., Chan,H.L. and Morey,L. (2021) Epigenetic mechanisms in  
633 breast cancer therapy and resistance. *Nat Commun*, **12**, 1786.
- 634 48. Murphy,P.J., Wu,S.F., James,C.R., Wike,C.L. and Cairns,B.R. (2018) Placeholder Nucleosomes Underlie  
635 Germline-to-Embryo DNA Methylation Reprogramming. *Cell*, **172**, 993-1006.e13.
- 636 49. Zilberman,D., Coleman-Derr,D., Ballinger,T. and Henikoff,S. (2008) Histone H2A.Z and DNA  
637 methylation are mutually antagonistic chromatin marks. *Nature*, **456**, 125–129.
- 638 50. Conerly,M.L., Teves,S.S., Diolaiti,D., Ulrich,M., Eisenman,R.N. and Henikoff,S. (2010) Changes in  
639 H2A.Z occupancy and DNA methylation during B-cell lymphomagenesis. *Genome Res.*,  
640 10.1101/gr.106542.110.
- 641 51. Fleischer,T., Tekpli,X., Mathelier,A., Wang,S., Nebdal,D., Dhakal,H.P., Sahlberg,K.K., Schlichting,E.,  
642 Børresen-Dale,A.-L., Borgen,E., *et al.* (2017) DNA methylation at enhancers identifies distinct  
643 breast cancer lineages. *Nat Commun*, **8**, 1379.

- 644 52. Mao,Z., Pan,L., Wang,W., Sun,J., Shan,S., Dong,Q., Liang,X., Dai,L., Ding,X., Chen,S., *et al.* (2014)  
645 Anp32e, a higher eukaryotic histone chaperone directs preferential recognition for H2A.Z. *Cell*  
646 *Research*, **24**, 389–399.
- 647 53. Obri,A., Ouararhni,K., Papin,C., Diebold,M.-L., Padmanabhan,K., Marek,M., Stoll,I., Roy,L., Reilly,P.T.,  
648 Mak,T.W., *et al.* (2014) ANP32E is a histone chaperone that removes H2A.Z from chromatin.  
649 *Nature*, **505**, 648–653.
- 650



**Figure 1**

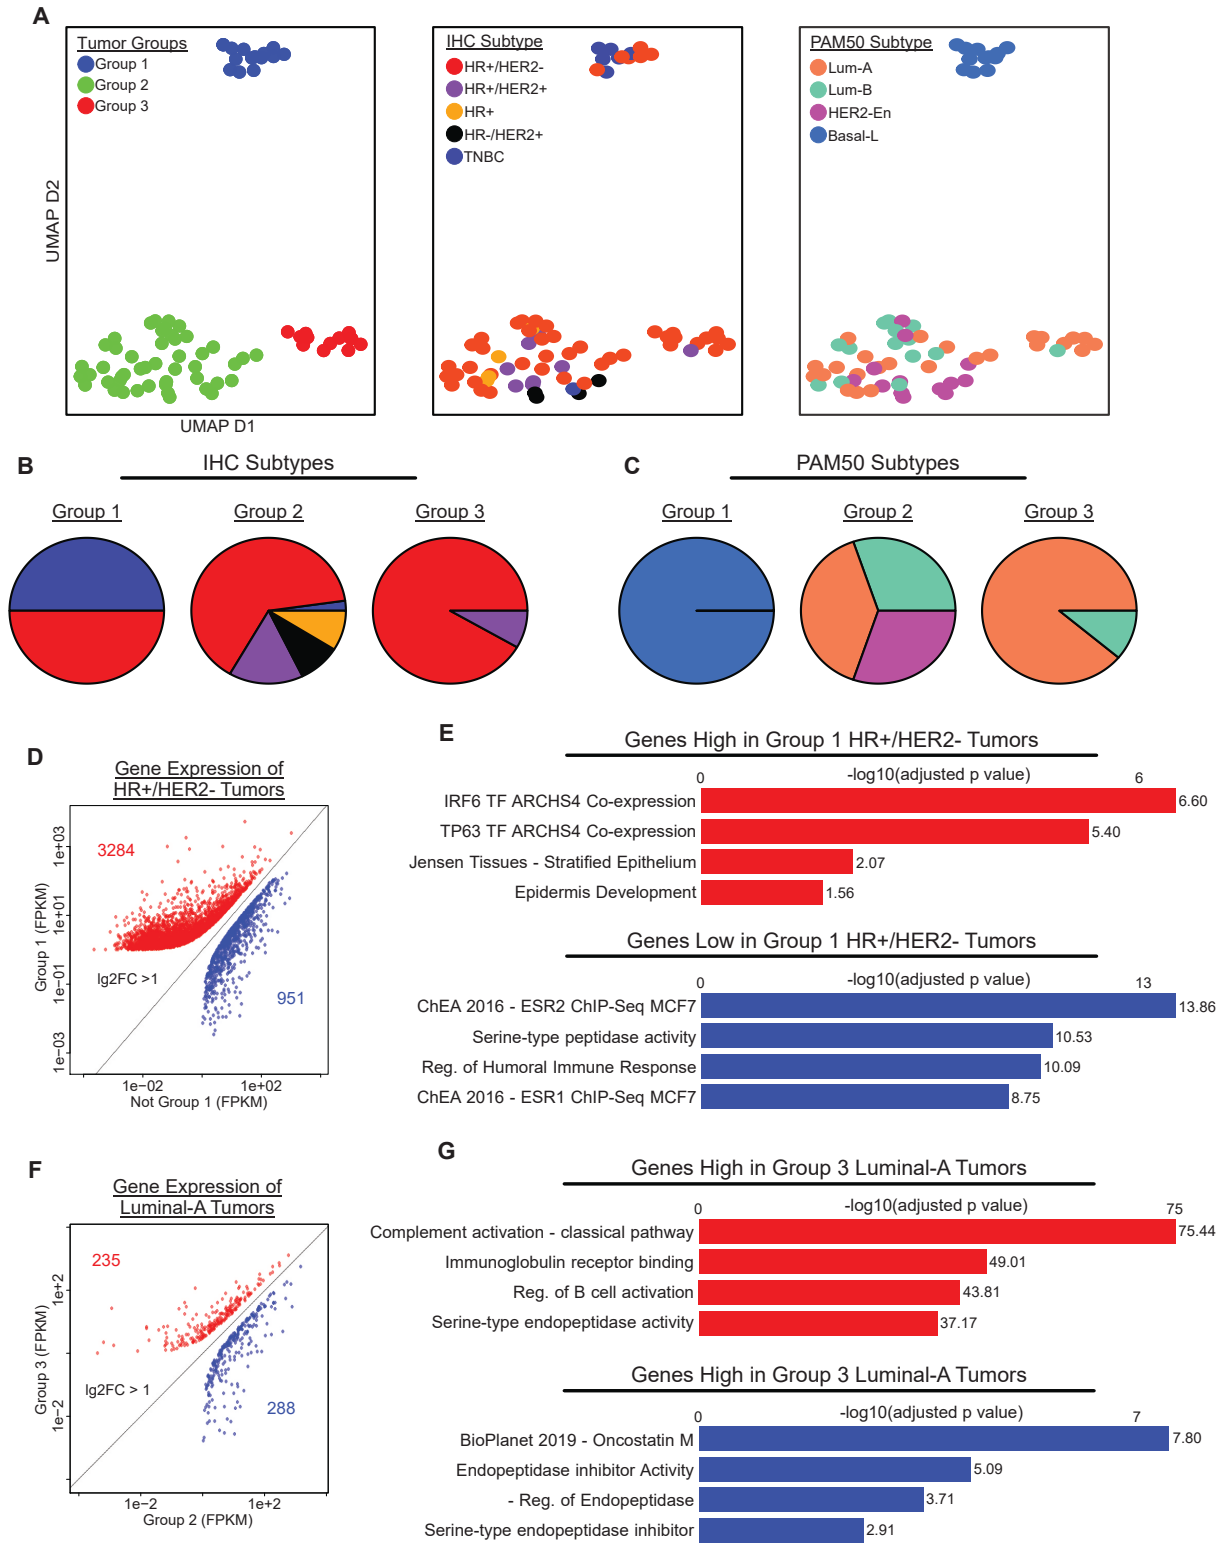

**Figure 1:**

Chromatin Accessibility Distinguishes Breast Cancer Subtypes. A) UMAP dimension reduction plots depicting three distinct groups of tumors, colored by group (n=74), IHC subtype (n=69) and PAM50 subtype (n=65). B-C) Individual pie charts depict groups of tumors based on IHC subtypes (B) and PAM50 subtypes (C), indicating tumor groups distinguish breast cancer subtypes. D-E) Scatterplots depicting genes found to have higher or lower expression in HR+/HER2- tumors in group 1 (n=6) compared to rest (n=40) (D) and in Luminal-A tumors in group 3 (n=8) compared to group 2 (n=17) (E). F-G) Bar charts depicting significance of gene ontology results from Enrichr, investigating genes found to have higher and lower expression in HR+/HER2- patients in group 1 compared to rest (F) and in Luminal-A tumors in group 3 compared to group 2 (G). Adjusted p-values obtained within Enrichr.

**Figure 2**

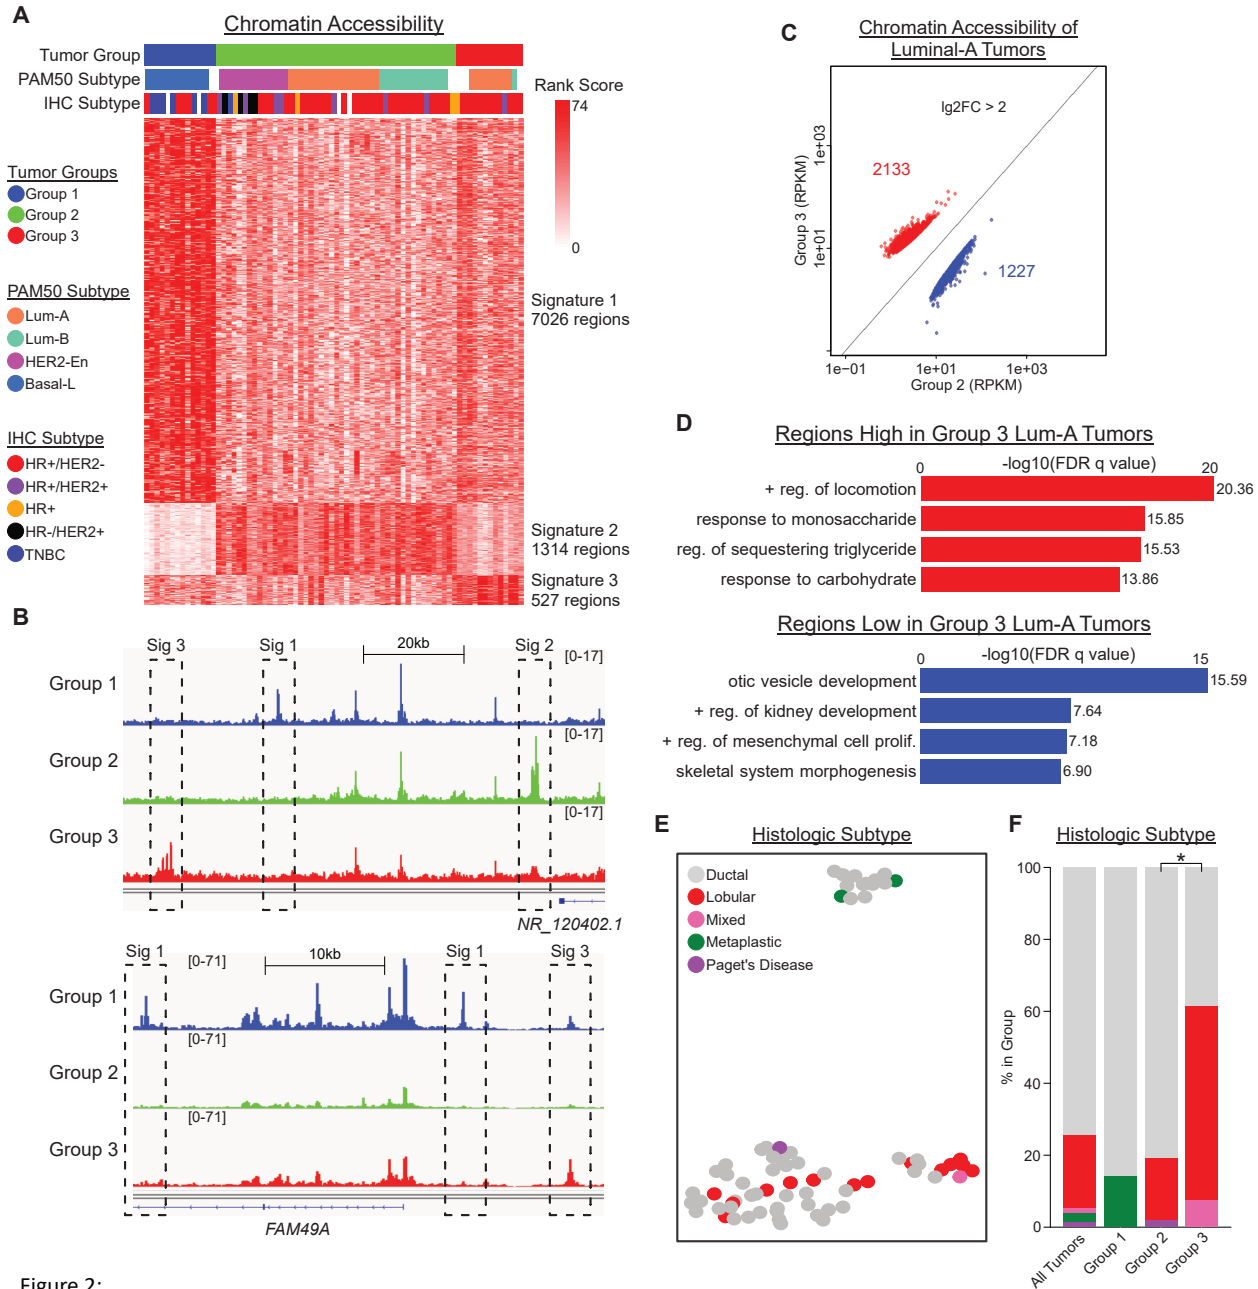

**Figure 2:**

Distinct Chromatin Accessibility Signatures Associate with each Tumor Group. A) Heatmap showing 3 groups of chromatin regions, each showing greater accessibility in their respective tumor group compared to the rest (Lg2FC > 2.5). B) Screenshots from IGV depicting average accessibility of tumor groups in regions within each chromatin signature. C) Scatterplot displaying regions found to have higher or lower accessibility in Luminal-A tumors in group 3 (n=8) compared to group 2 (n=17). D) Bar charts depicting significance of gene ontology results from GREAT, investigating genes nearby (<1000 kb) regions found to have higher and lower accessibility in group 3 Luminal-A tumors compared to group 2. FDR q-values obtained within GREAT. E-F) UMAP plot (E) and stacked barplot (F) showing the distribution of cancer types between each tumor group. P-value in F obtained from Chi-squared test within cBioPortal.

**Figure 3**

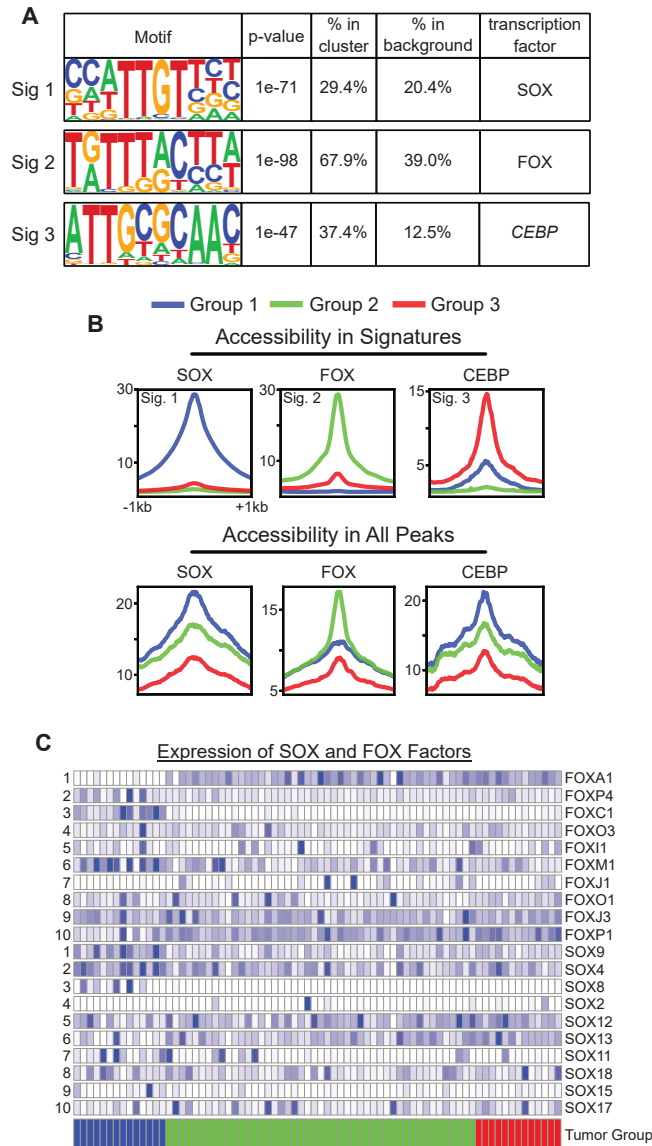

**Figure 3:**

Accessibility at FOX and SOX Binding Sites Define Tumor Groups. A) Table displaying top motif result from HOMER for each chromatin signature. Due to similarity across SOX and FOX binding motifs, we refer to SOX6 simply as SOX, and FOXM1 simply as FOX. P-values obtained within HOMER. B) Profile plots depicting average accessibility of tumor groups in motif regions, both within the motif's respective signature (top) and in all accessible peak regions in tumors (bottom), indicating that group 1 and 2 tumors show increased accessibility at SOX and FOX motifs, respectively. We again use the SOX6 motif to represent SOX motifs, and the FOXM1 motif to represent FOX motifs. C) Heatmap showing expression of SOX and FOX factors across tumor groups. Factors are ordered from 1 to 10 by standard deviation across tumors.



**Figure 4**

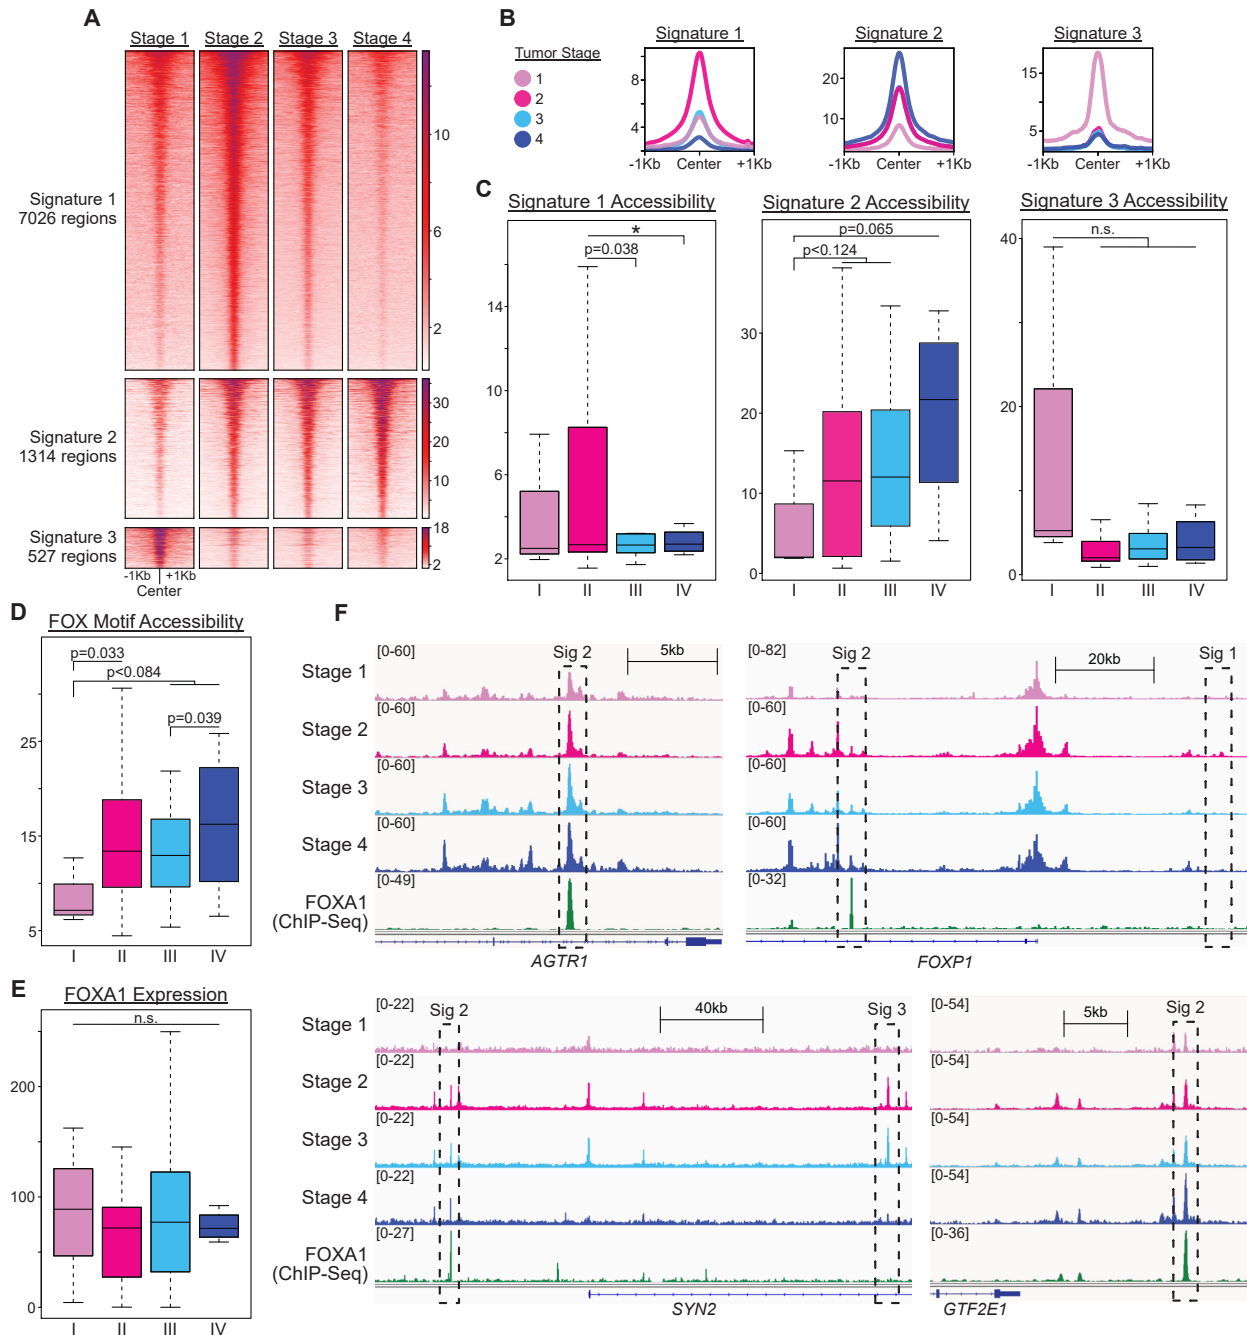

**Figure 4:**

Chromatin Accessibility in FOX motifs and Signature 2 Regions Associate with Tumor Progression Stages. A-B) Heatmaps (A) and profile plots (B) showing accessibility in signatures 1, 2 and 3 across tumor stages. Heatmaps have regions ordered from greatest to least average accessibility across tumor stages. C) Boxplots of accessibility in signatures 1, 2 and 3 across tumor stages, indicating that only signature 2 shows an accessibility trend across stages. D-E) Boxplots comparing accessibility of FOX motifs in accessible peak regions ( $n=96280$ ) (D) and FOXA1 expression levels (E) across tumor stages. F) Screenshots from IGV depicting average accessibility of tumor stages and FOXA1 binding in MCF-7 cells from ChIP-Seq in regions within each chromatin signature. ChIP-Seq data is Log2FC over control. P-values in C-E obtained from one-tailed parametric t-tests. \* is  $p<0.01$ , \*\* is  $p<0.001$ , \*\*\* is  $p<0.0001$ .

Figure 5

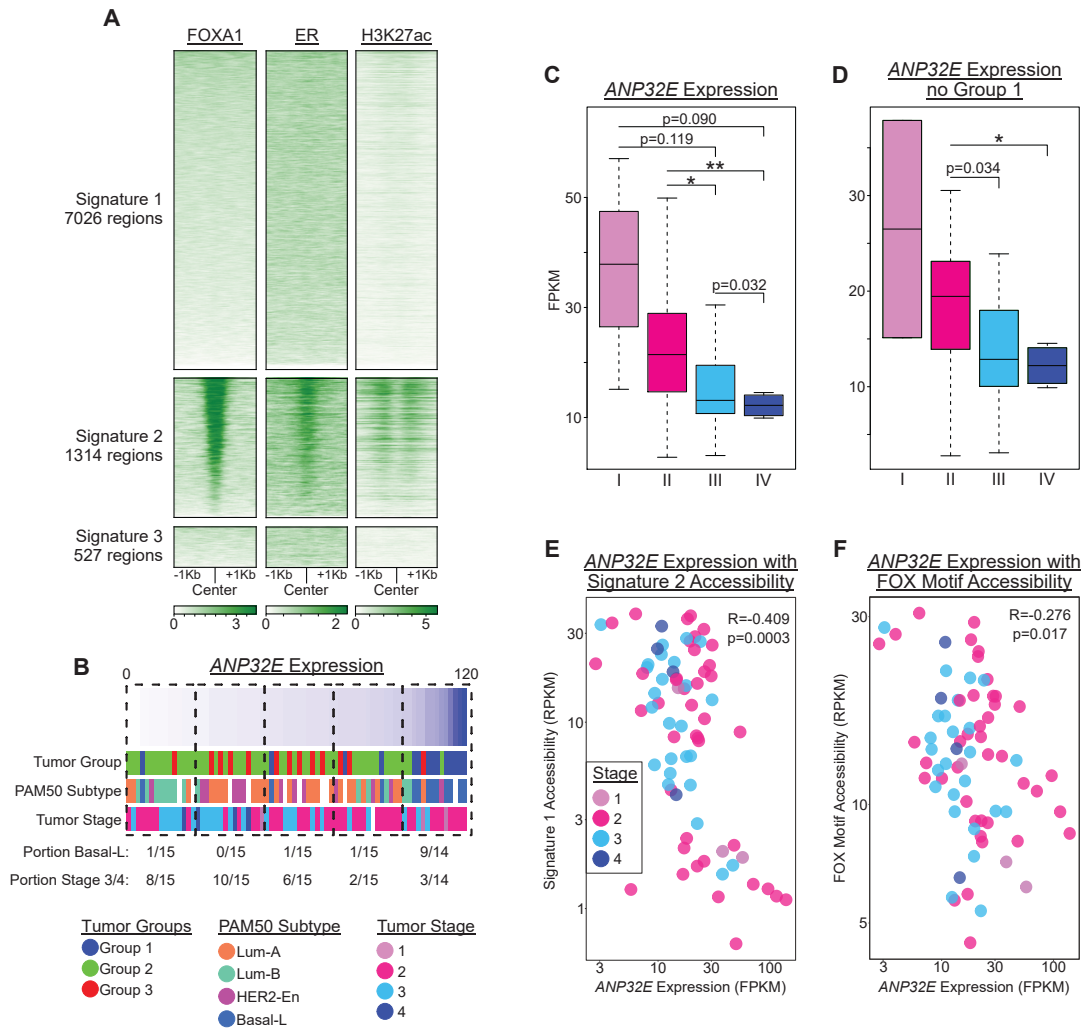

Figure 5:

ANP32E Expression Levels Associate with FOX Motif Accessibility and Tumor Stage. A) Heatmaps showing binding of FOXA1, ER, and H3K27ac in MCF-7 cells within regions from signatures 1, 2 and 3. Data from ChIP-Seq of MCF-7 cells; regions sorted from greatest to least FOXA1 enrichment. B) Heatmap with tumors ordered by ANP32E expression and annotated by tumor group, PAM50 subtype and tumor stage, indicating that late-stage tumors group with lower ANP32E expression. C-D) Boxplots comparing ANP32E expression by tumor stage, both in all tumors with available stage data (n=73) (C) and in only tumors from groups 2 and 3 (n=59) (D), indicating that late-stage tumors have significantly lower expression of ANP32E. P-values obtained from one-tailed parametric t-tests. \* is p<0.01, \*\* is p<0.001, \*\*\* is p<0.0001. E-F) Scatterplots showing correlation of ANP32E expression with tumor's accessibility in signature 2 regions (E) and with tumor's average accessibility in FOX motifs across all accessible peak regions (n=96280) (F), with tumors colored by stage. R denotes Pearson correlation coefficient; p-values from Pearson's product moment correlation coefficient.

Figure 6

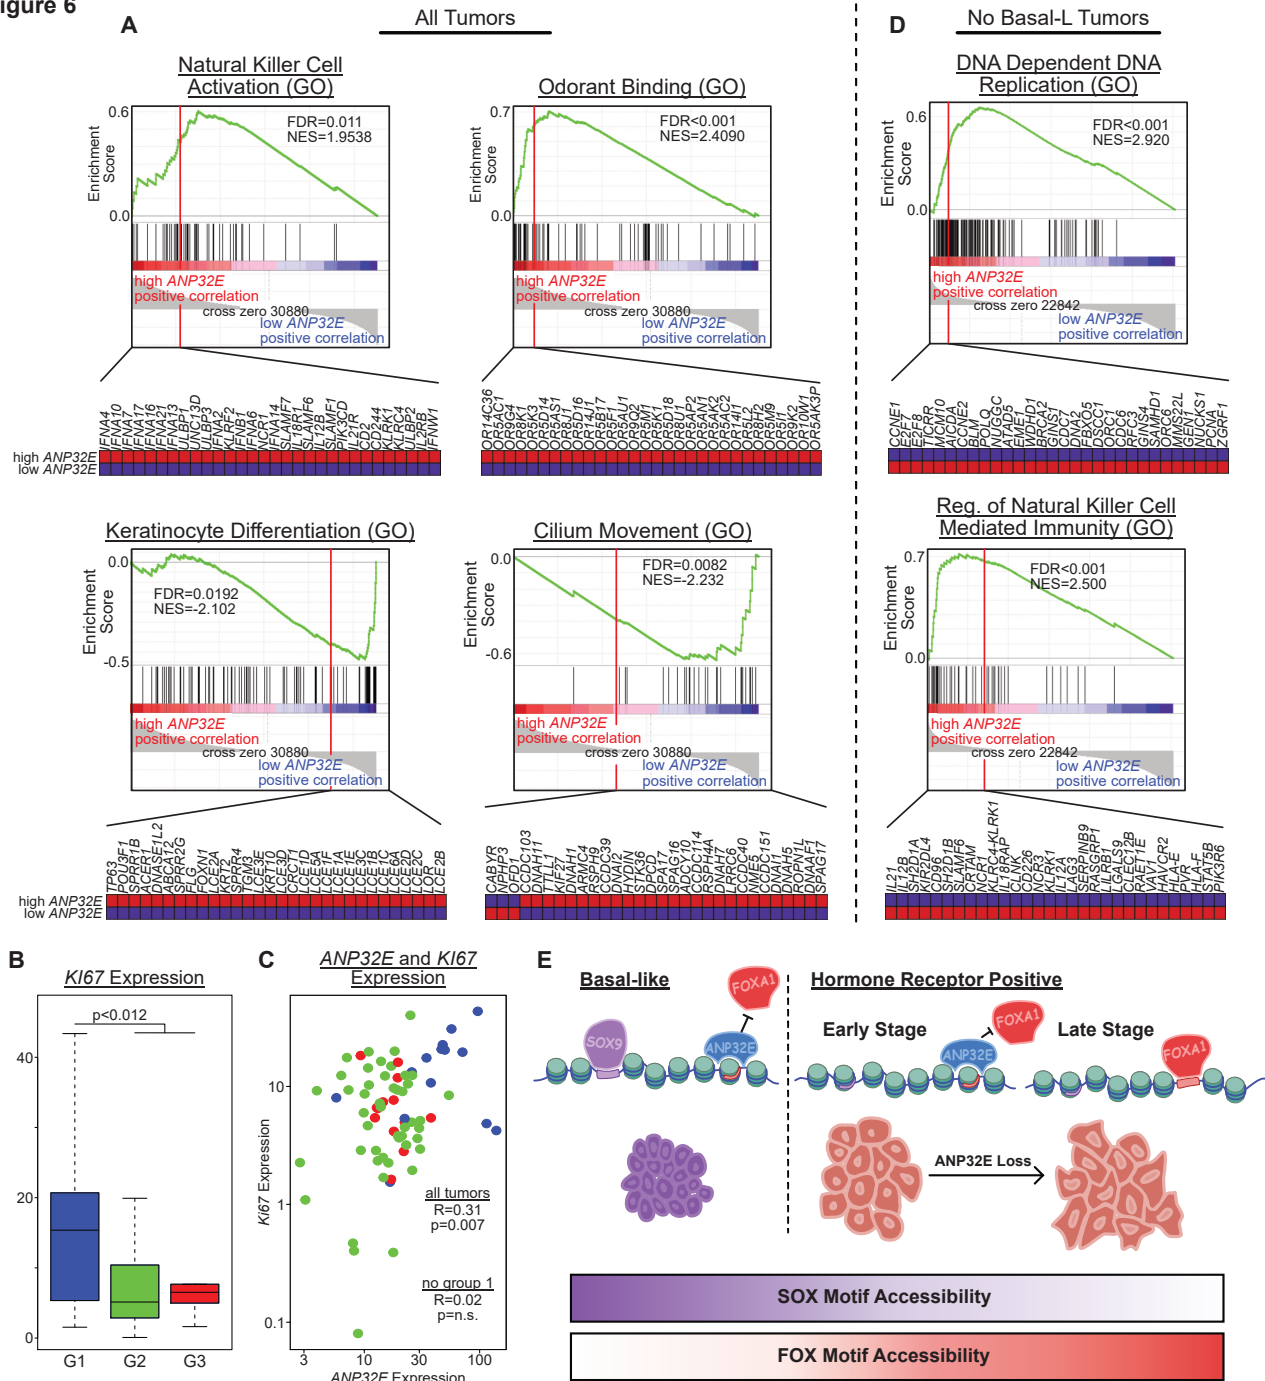

Figure 6:

*ANP32E* Expression Levels Associate with Distinct Expression Profiles. A) GSEA plots depicting gene ontology associations with high and low *ANP32E* expression levels for all tumors with RNA-seq data in the TCGA-BRCA project (n=1222). FDR values and normalized enrichment scores (NES) obtained within GSEA. B) Boxplot of *Ki67* expression across tumor groups. P-value from one-tailed parametric t-test. C) Scatterplot showing the association between *ANP32E* and *Ki67* expression levels, with tumors colored by tumor group. R denotes Pearson correlation coefficient; p-values from Pearson's product moment correlation coefficient (done for all tumors, and all tumors excluding group 1). D) GSEA plots for all tumors excluding Basal-L (n=1110). E) Model displaying the association of *ANP32E* expression levels with multiple characteristics of breast cancer.
